# Supplementary material for: Efficient Treatment of Pulpitis via Transplantation of Human Pluripotent Stem Cell-Derived Pericytes Partially through LTBP1-Mediated T Cell Suppression
Source: MDPI journal article supplement (doi:10.3390/biomedicines11123199), 2023-12-01
Supplement: s1 [file s1]

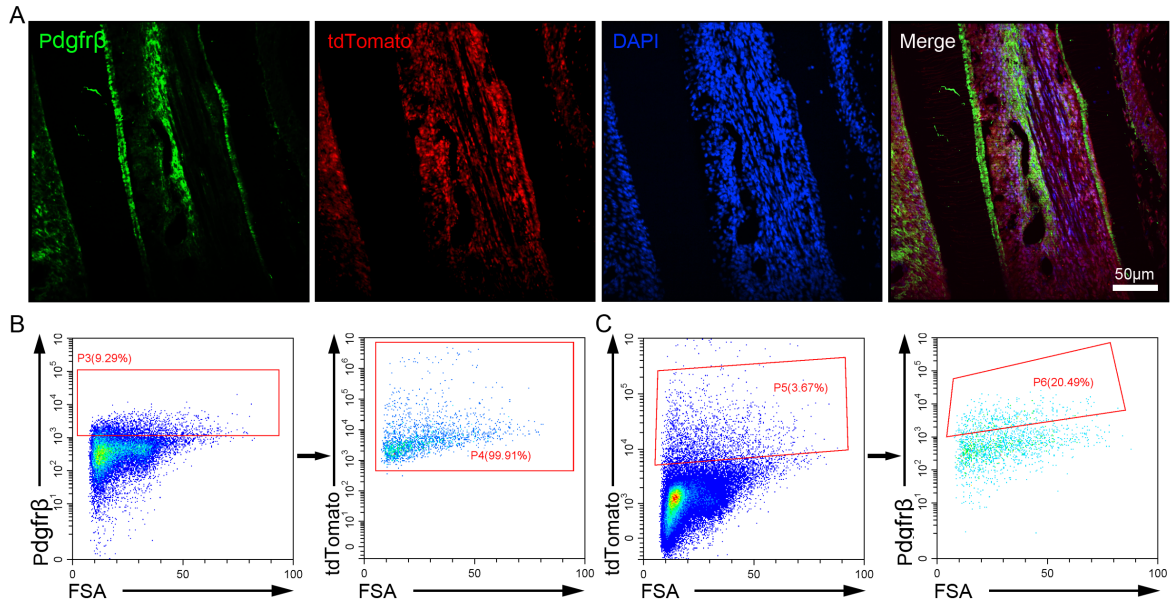

**Figure S1. Dental pulp pericyte lineage tracing using *Wnt1-Cre2:Rosa26-tdTomato* mice model.**

- A. Detection of  $\text{Pdgfr}\beta^+$  (green) cells in dental pulp of *Wnt1-Cre2:Rosa26-tdTomato* mice by immunofluorescence staining (LSM 880 with Airyscan; 40 × 10 magnification). Scale bar: 50 μm.
- B. FACS analysis for tdTomato expression in dental pulp  $\text{Pdgfr}\beta^+$  cells (Beckman Coulter CytoFLEX).
- C. FACS analysis for the expression of  $\text{Pdgfr}\beta$  in  $\text{tdTomato}^+$  cells (Beckman Coulter CytoFLEX).

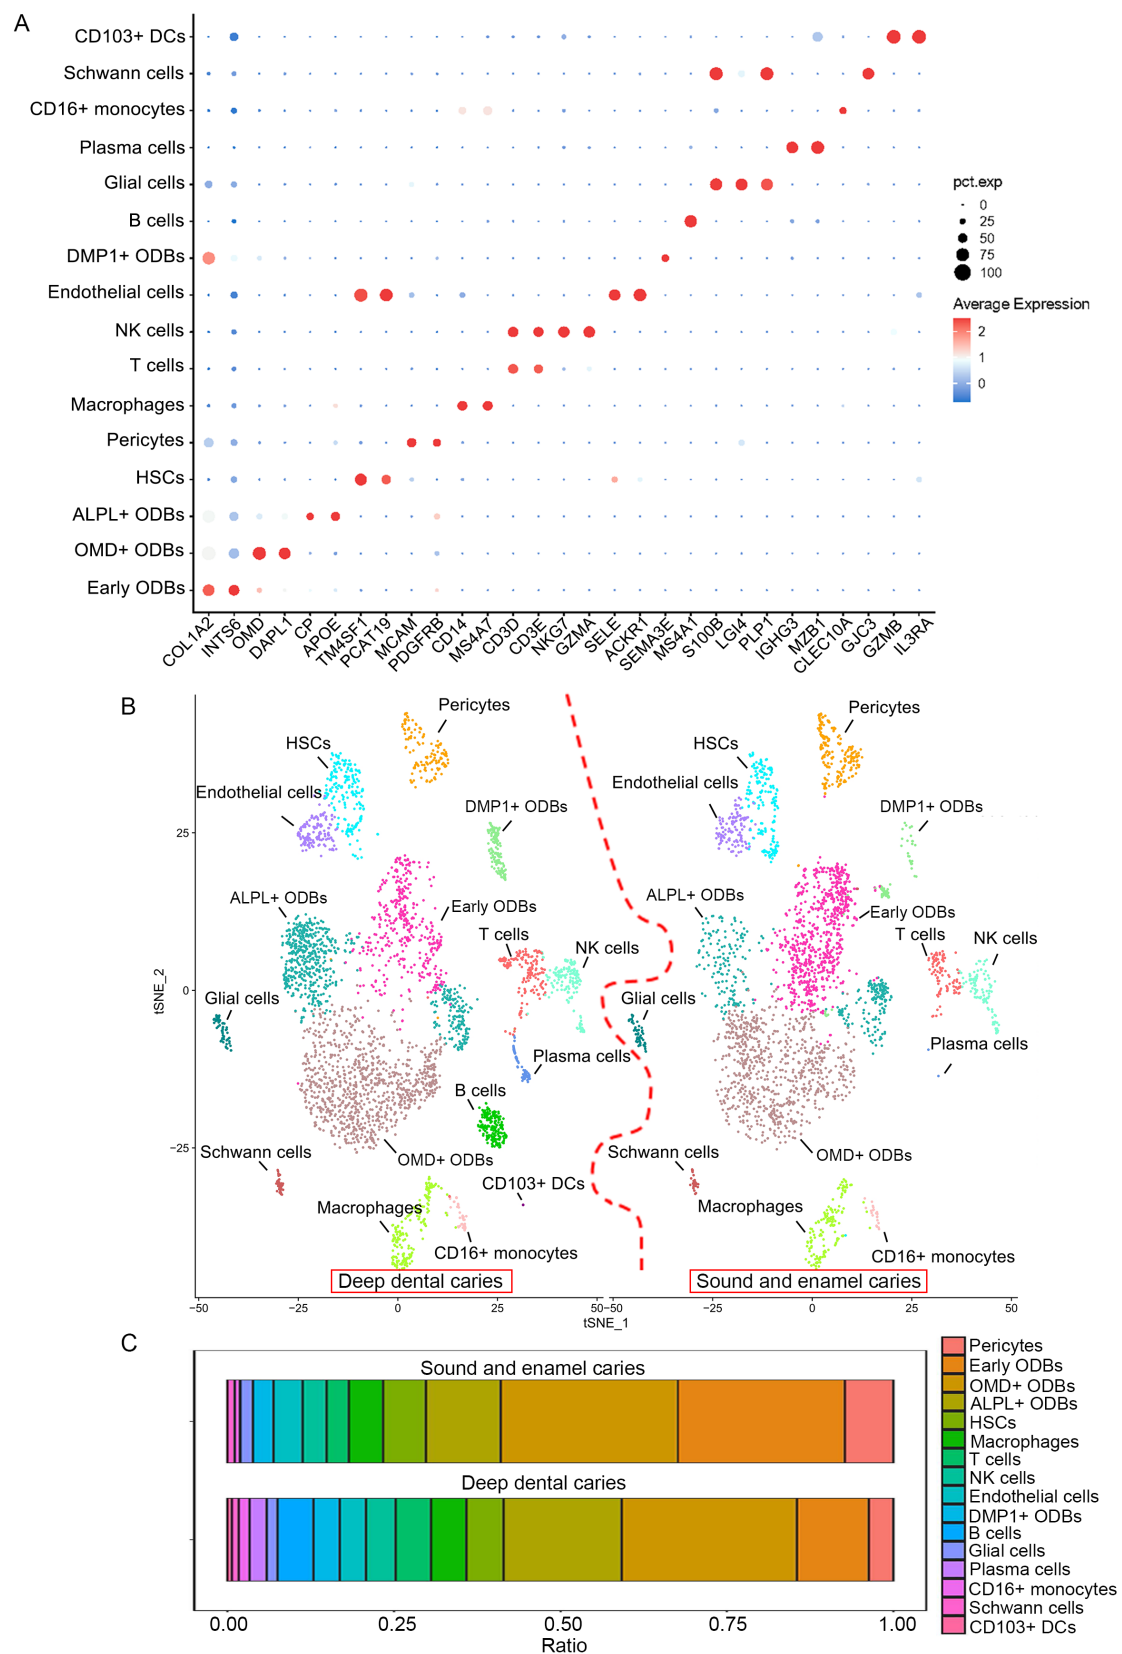

**Figure S2. Single-cell transcriptome profiling of human dental pulp from normal teeth, enamel caries, and deep dentine caries.**

A. The average expression levels of the marker genes used in the cell-type

annotation.

- B. UMAP plots showing different distributions of cell populations in the sound/enamel caries and deep dental caries.
- C. Stacked bar plots comparing the percentages of cell populations from the sound/enamel caries and deep dental caries.

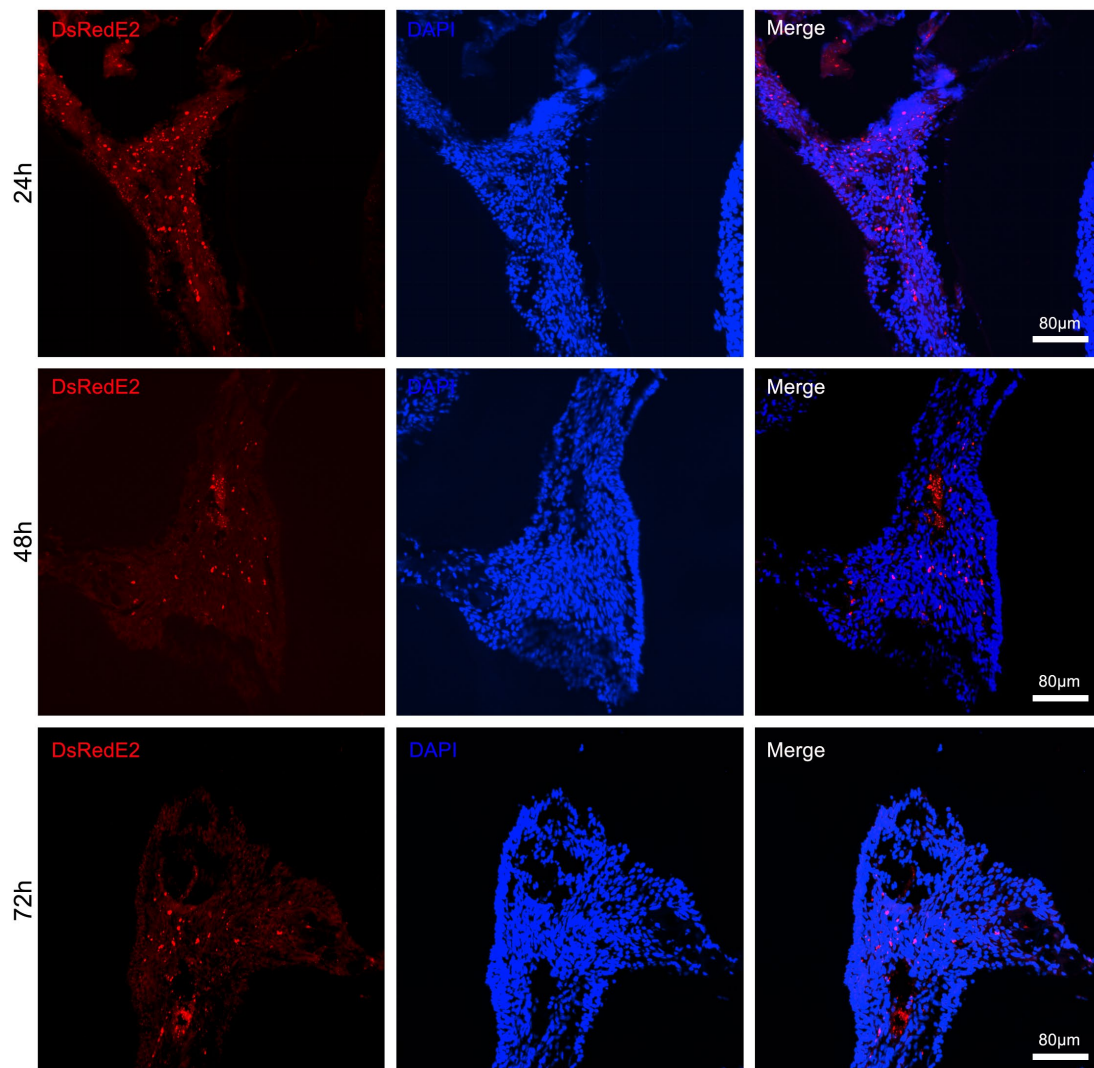

**Figure S3. Transplanted DsRedE2<sup>+</sup> CNC PCs survived for at least 72 h in vivo after transplantation.**

Detection of DsRedE2<sup>+</sup> (red) cells in dental pulp by immunofluorescence staining (LSM 880 with Airyscan; 20 × 10 magnification). Scale bar: 80 μm.

**Supplementary Table S1. Primers used for QRT-PCR.**

| Gene                            | Direction | Sequences                             |
|---------------------------------|-----------|---------------------------------------|
| <i>IL-1<math>\beta</math></i>   | Forward   | 5' GAA ATG CCA CCT TTT GAC AGT G 3'   |
|                                 | Reverse   | 5' TGG ATG CTC TCA TCA GGA CAG 3'     |
| <i>IL-6</i>                     | Forward   | 5' TAG TCC TTC CTA CCC CAA TTT CC 3'  |
|                                 | Reverse   | 5' TTG GTC CTT AGC CAC TCC TTC 3'     |
| <i>TNF-<math>\alpha</math></i>  | Forward   | 5' CCC TCA CAC TCA GAT CAT CTT CT 3'  |
|                                 | Reverse   | 5' GCT ACG ACG TGG GCT ACA G 3'       |
| <i>CCL2</i>                     | Forward   | 5' TTA AAA ACC TGG ATC GGA ACC AA 3'  |
|                                 | Reverse   | 5' GCA TTA GCT TCA GAT TTA CGG GT 3'  |
| <i>MMP9</i>                     | Forward   | 5' GCA GAG GCA TAC TTG TAC CG 3'      |
|                                 | Reverse   | 5' TGA TGT TAT GAT GGT CCC ACT TG 3'  |
| <i>DMP1</i>                     | Forward   | 5' CAT TCT CCT TGT GTT CCT TTG GG 3'  |
|                                 | Reverse   | 5' TGT GGT CAC TAT TTG CCT GTG 3'     |
| <i>DSPP</i>                     | Forward   | 5' ATT CCG GTT CCC CAG TTA GTA 3'     |
|                                 | Reverse   | 5' CTG TTG CTA GTG GTG CTG TT 3'      |
| <i><math>\beta</math>-actin</i> | Forward   | 5' TAT GGA ATC CTG TG GCA TC 3'       |
|                                 | Reverse   | 5' GTG TTG GCA TAG AGG TCT T 3'       |
| <i>GAPDH</i>                    | Forward   | 5' GAA GGT GAA GGT CGG AGT C 3'       |
|                                 | Reverse   | 5' GAA GAT GGT GAT GGG ATT TC 3'      |
| <i>OCT4</i>                     | Forward   | 5' GAC AGG GGG AGG GGA GGA GCT AGG 3' |

|               |         |                                             |
|---------------|---------|---------------------------------------------|
|               | Reverse | 5' CTT CCC TCC AAC CAG TTG CCC CAA AC<br>3' |
| NANOG         | Forward | 5' CAG CCC AGA TTC TTC CAC CAG TCC C 3'     |
|               | Reverse | 5' CGG AAG CGT TCC CAG TCG GGT TCA CC<br>3' |
| p75           | Forward | 5' CTG CCT GGA CAG CGT GAC GTT 3'           |
|               | Reverse | 5' GCA GCG CCC AGT CGT CTC AT 3'            |
| SOX10         | Forward | 5' CCC GCA CTA CAC CGA CCA 3'               |
|               | Reverse | 5' AGG AGA AAG CCG AGT AGA 3'               |
| HNK1          | Forward | 5' CTC CTT CGA GAA CTT GTC ACC 3'           |
|               | Reverse | 5' GGG TCA GTG AAG CCC TTC TT 3'            |
| NG2           | Forward | 5' GTC TTT TGA GGC TGC CTG TC 3'            |
|               | Reverse | 5' CTG TGT GAC CTG GAA GAG CA 3'            |
| PDGFR $\beta$ | Forward | 5' ACC TGC AAT GTG ACG GAG AG 3'            |
|               | Reverse | 5' GGG TGC GGT TGT CTT TGA AC 3'            |
| TUBB3         | Forward | 5' GCG CCT TTG GAC ACC TAT TCA 3'           |
|               | Reverse | 5' GCC CTC CGT ATA GTG CCC T 3'             |
| VEGFA         | Forward | 5' GCA CAT AGA GAG AAT GAG CTT CC 3'        |
|               | Reverse | 5' CTC CGC TCT GAA CAA GGC T 3'             |
| LTBP1         | Forward | 5' CTG ACG GCC ACG AAC TTC C 3'             |
|               | Reverse | 5' GCA CTG ACA TTT GTC CCT TGA 3'           |

**Supplementary Table S2. Antibodies used in immunofluorescence staining.**

| Antigen                                                                     | Host   | Dilution | Company       | Cat. No.  |
|-----------------------------------------------------------------------------|--------|----------|---------------|-----------|
| PDGFR $\beta$                                                               | mouse  | 1:20     | Santa Cruz    | sc-374573 |
| Lycopersicon<br>Esculentum<br>(Tomato) Lectin<br>(LEL, TL),<br>DyLight™ 649 |        | 1:50     | Vector        | DL-1178-1 |
| Fibrinogen                                                                  | rabbit | 1:100    | Abcam         | ab92572   |
| TCR $\beta$                                                                 |        | 1:100    | BD Pharmingen | 553172    |
| HNK1                                                                        | mouse  | 1:200    | Sigma-Aldrich | c6680     |
| SOX10                                                                       | goat   | 1:100    | R&D System    | AF2864    |
| p75                                                                         | rabbit | 1:200    | Promega       | G3231     |
| Goat anti-mouse<br>IgG Alexa 555                                            | goat   | 1:1000   | Invitrogen    | A21422    |
| Goat anti-rabbit IgG<br>Alexa 488                                           | goat   | 1:1000   | Invitrogen    | A11008    |
| Goat anti-rabbit IgG<br>Alexa 555                                           | goat   | 1:1000   | Invitrogen    | A21428    |
| Donkey anti-goat<br>IgG Alexa 488                                           | donkey | 1:1000   | Invitrogen    | A32814    |

**Supplementary Table S3. Antibodies used in FACS.**

| <b>Antigen</b>            | <b>Label</b>    | <b>Company</b>   | <b>Cat. No.</b> |
|---------------------------|-----------------|------------------|-----------------|
| Anti-Human CD13           | PE              | BD<br>Pharmingen | 555394          |
| Anti-Human CD146          | PE              | BD<br>Pharmingen | 550315          |
| Anti- Human NG2           | Alexa Fluor 647 | BD<br>Pharmingen | 562414          |
| Anti-Human CD140b         | PE              | BD<br>Pharmingen | 558821          |
| Anti-Human CD271<br>(p75) | Alexa Fluor 647 | BD<br>Pharmingen | 560326          |
| Anti-Human CD57<br>(HNK1) | PE              | BD<br>Pharmingen | 560844          |
| Anti-Human CD3            | V450            | BD<br>Pharmingen | 560365          |
| Anti-Human TNF            | PE              | BD<br>Pharmingen | 554513          |
| Anti-Human IFN            | PE-Cy7          | BD<br>Pharmingen | 557643          |
| Anti-Mouse CD13           | FITC            | BD<br>Pharmingen | 558744          |

|                                        |                 |                      |        |
|----------------------------------------|-----------------|----------------------|--------|
| Anti- Mouse CD140b<br>(Pdgfr $\beta$ ) | Alexa Fluor 647 | BD<br><br>Pharmingen | 558428 |
|----------------------------------------|-----------------|----------------------|--------|
